# Supplementary material for: Exploring gastric bacterial community in young pigs
Source: PLOS journal article supplement (doi:10.1371/journal.pone.0173029), 2017-03-01

**Figure S1 Per Sample Rarefaction Curves.** Numbers indicate the pig identification number and the initials indicate stomach region (CO, contents; OX, oxyntic; PY, pyloric; GR, groove).

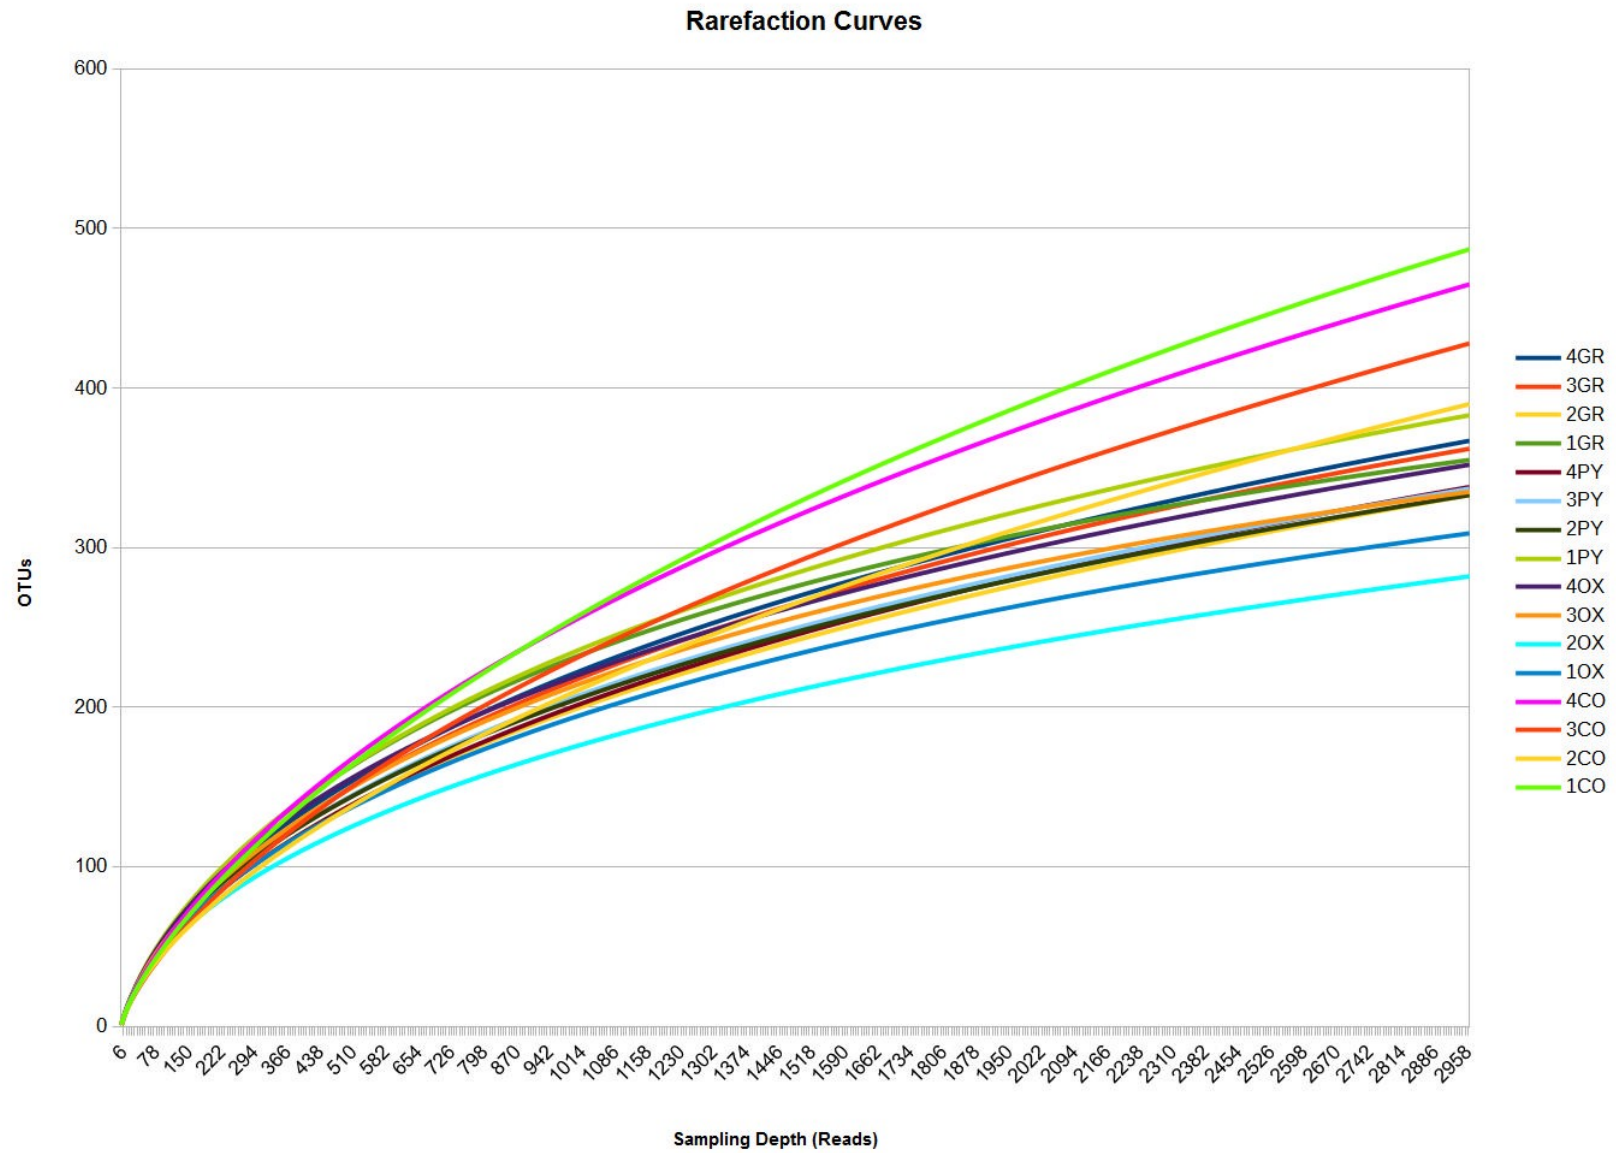

Supplement: S1 (10.1371/journal.pone.0173029.s001) [file journal.pone.0173029.s001]
